# Supplementary material for: Microbial Synthesis of Lactic Acid from Cotton Stalk for Polylactic Acid Production
Source: MDPI journal article supplement (doi:10.3390/microorganisms11081931), 2023-07-28
Supplement: s1 [file s1]

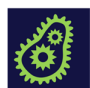

Supplementary Materials

## Microbial Synthesis of Lactic Acid from Cotton Stalk for Polylactic Acid Production

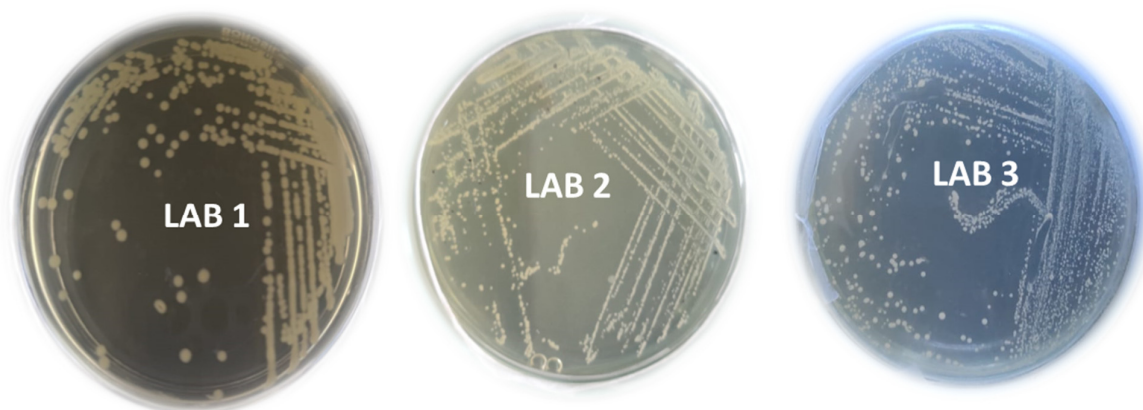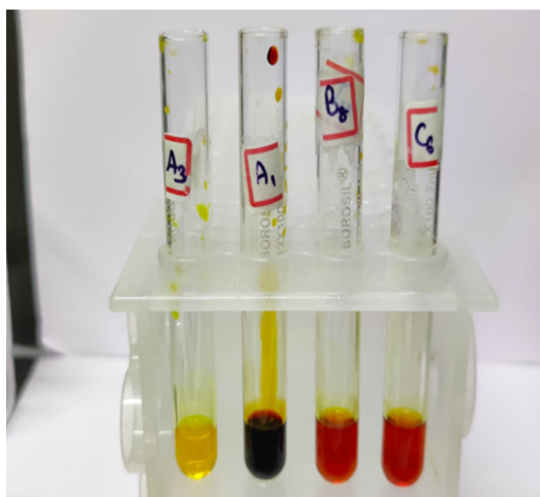

Glucose estimation using DNSA method of fermentation broth

Supplementary Figure S1. Isolation of lactic acid bacteria.

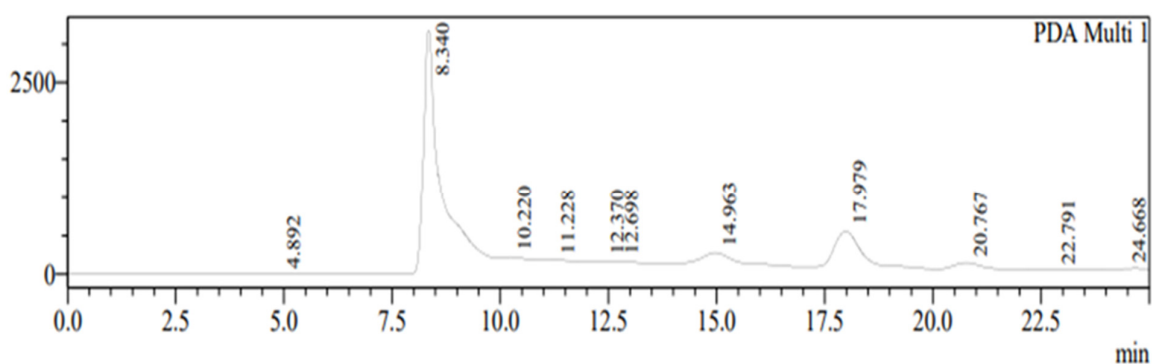

HPLC Chromatogram of LAB-2 isolate

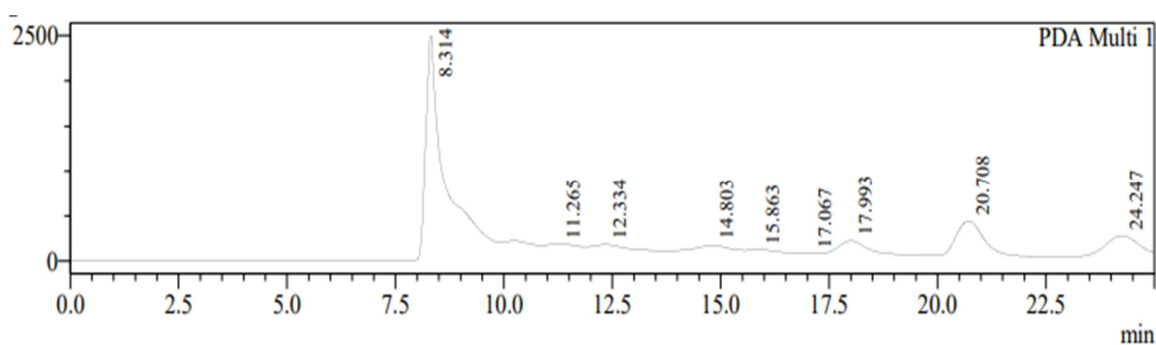

HPLC Chromatogram of LAB-3 isolate

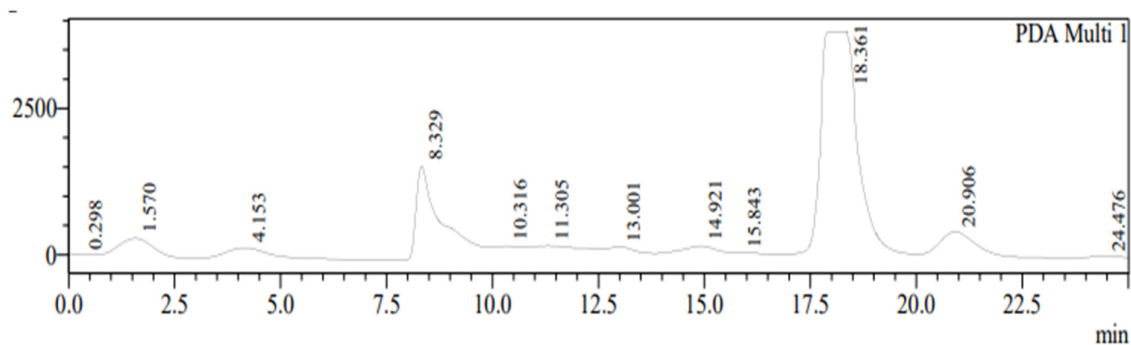

HPLC Chromatogram of LAB-4 isolate

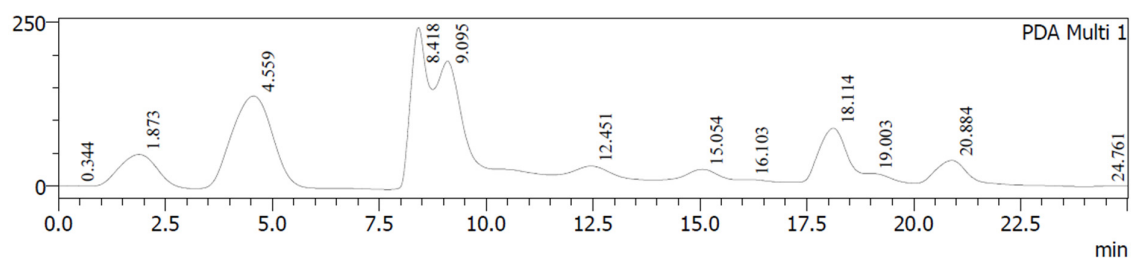

HPLC Chromatogram of LAB-5 isolate

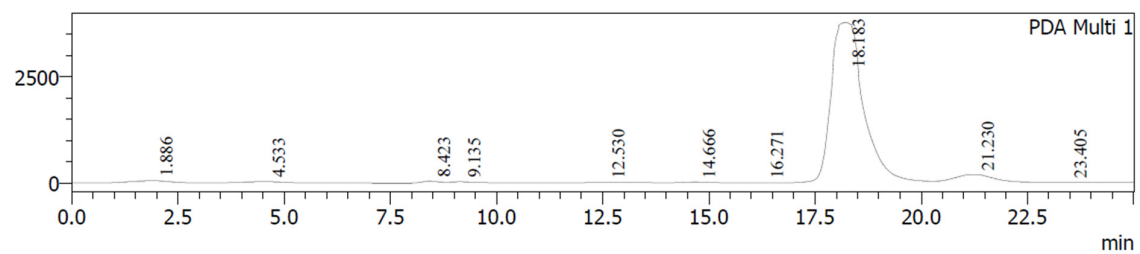

HPLC Chromatogram of LAB-6 isolate

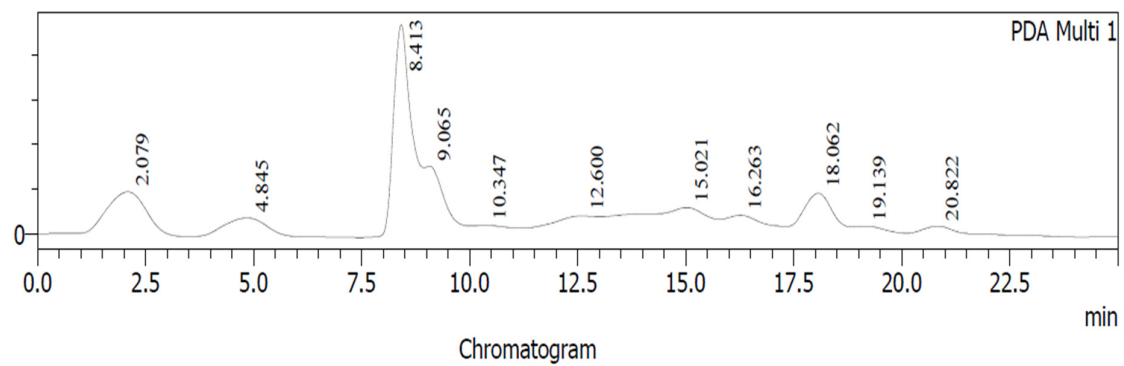

HPLC Chromatogram of LAB-11 isolate

**Supplementary Figure S2.** HPLC profiles of lactic acid concentrations by isolates.

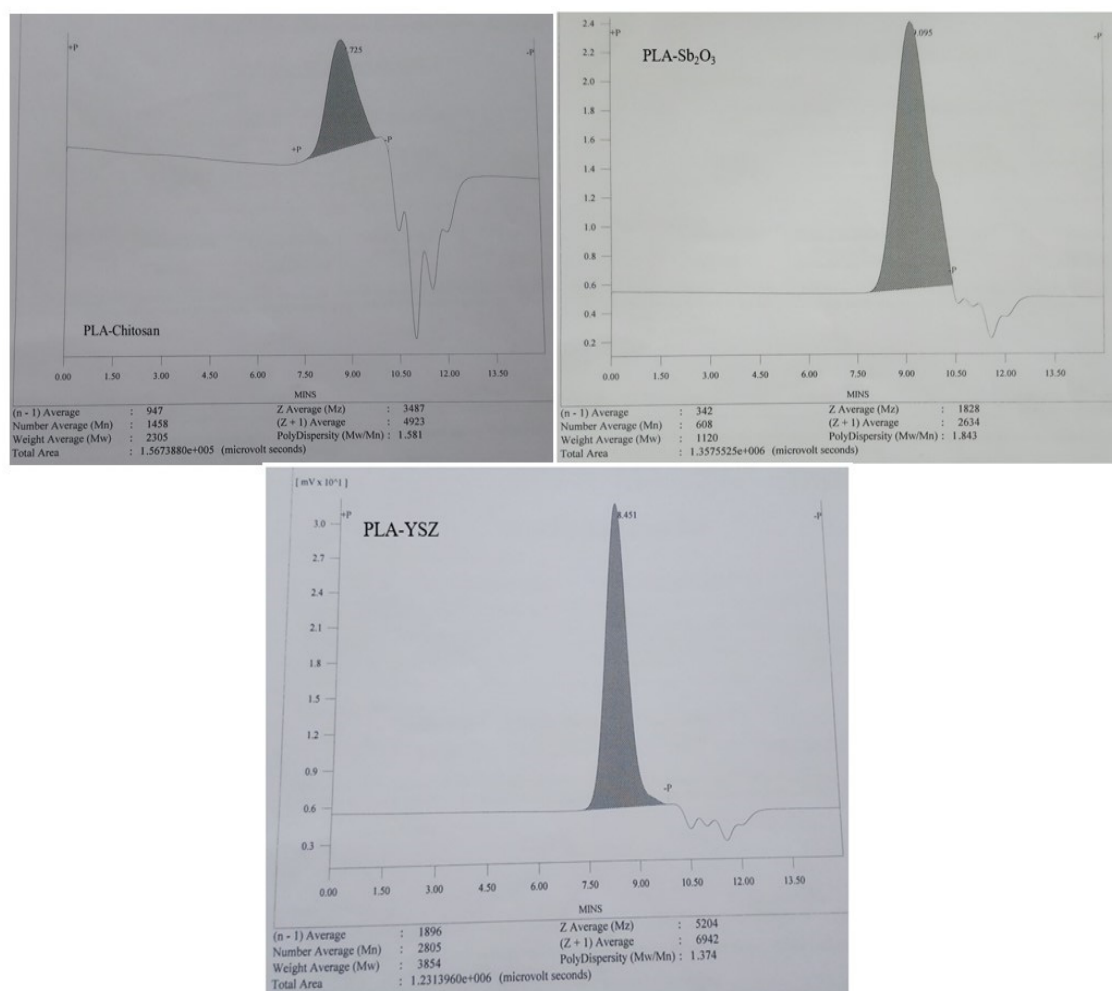

**Supplementary Figure S3.** GPC spectrum of resultant polymers i.e., PLA-Chitosan, PLA-Sb<sub>2</sub>O<sub>3</sub>, and PLA-YSZ.
